# Supplementary material
Source: publisher figshare collection journal article supplement (https://tandf.figshare.com/ndownloader/files/18613409)
Supplement: Supplementary file 1 [file 18613409]

Supplementary information


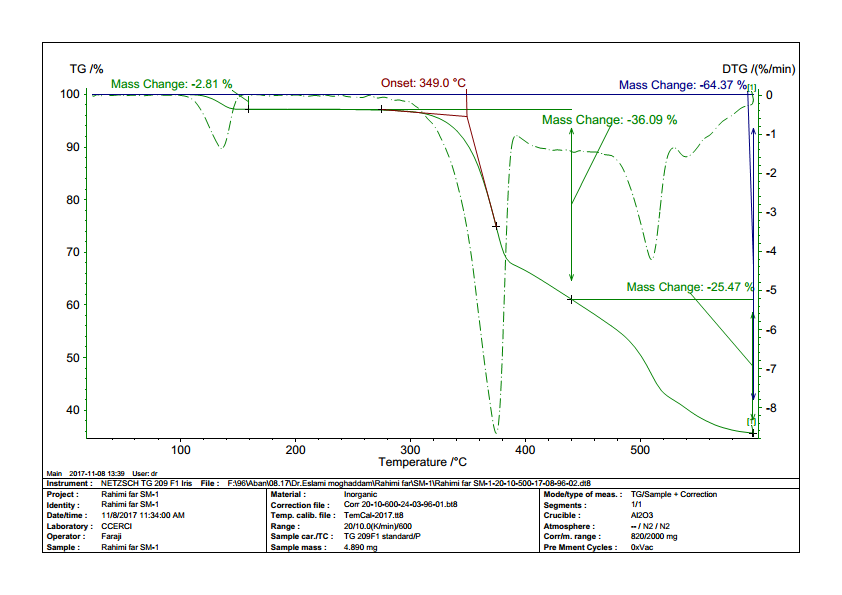


Figure S1. TGA analysis of Sm-PL3 Complex

Figure S2. UV-Vis. Spectrum of Sm-PL3 Complex

**
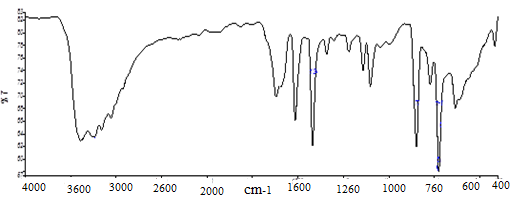
**

Figure S3. IR Spectrum of Sm-PL3 Complex


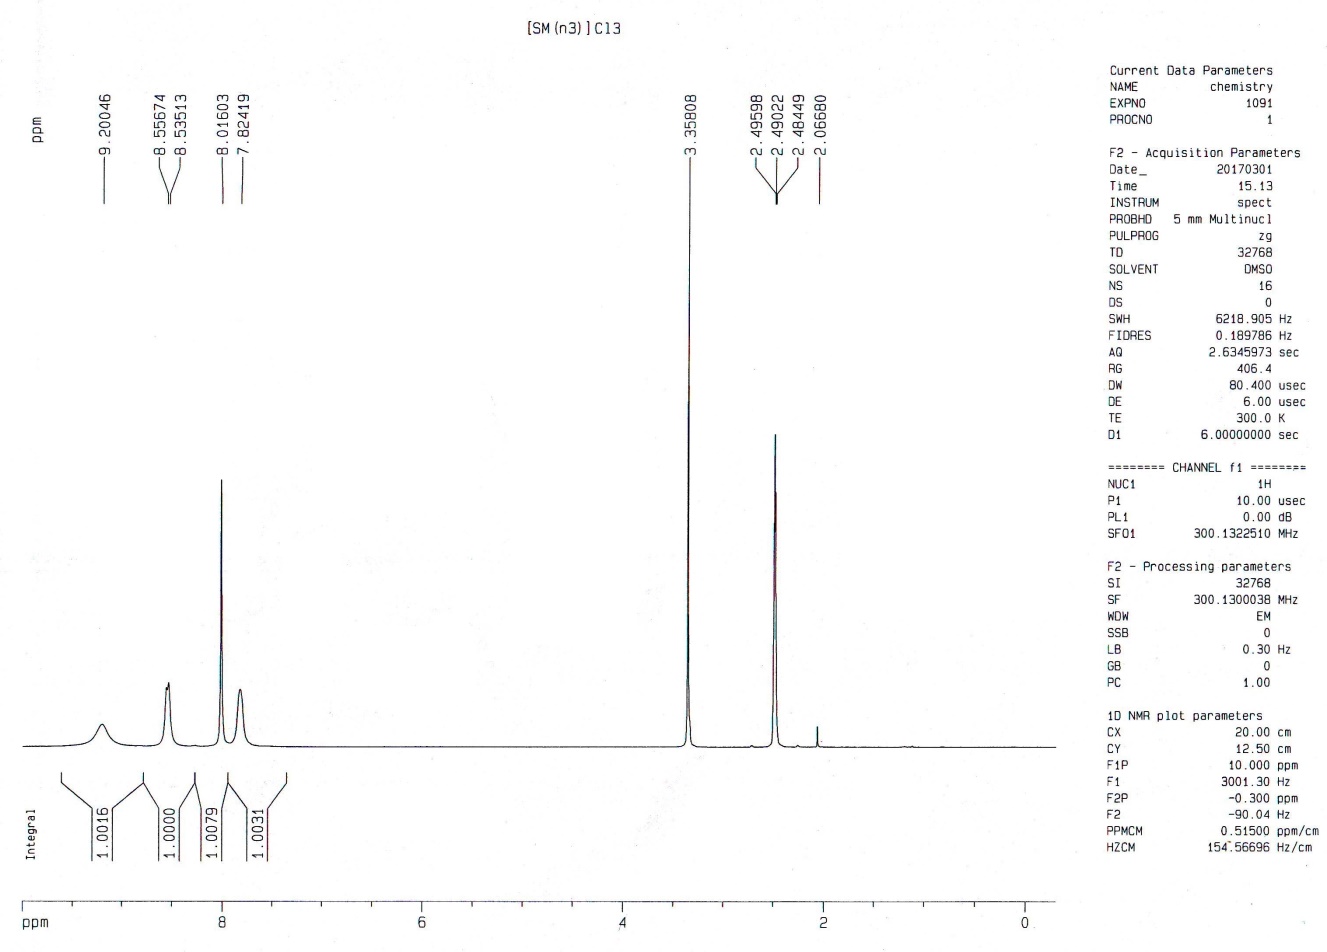


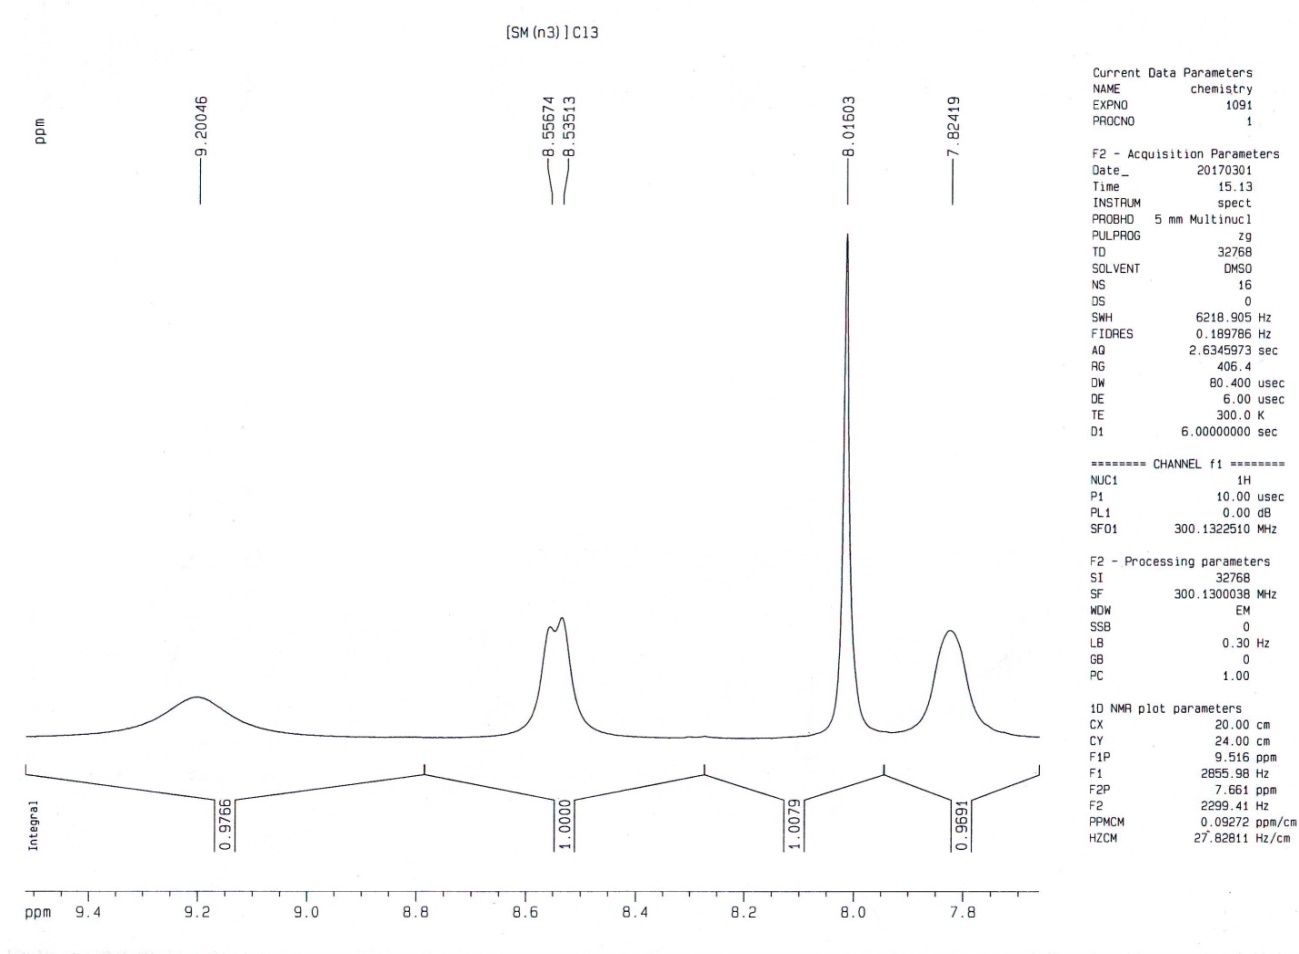


Figure S4. 1HNMR Spectrum of Sm-PL3 Complex
